# Supplementary material
Source: Springer Nature journal article supplement (https://www.springermedizin.de/resource/supplementary/12947_2013_499_MOESM1_ESM.pdf/9555928)

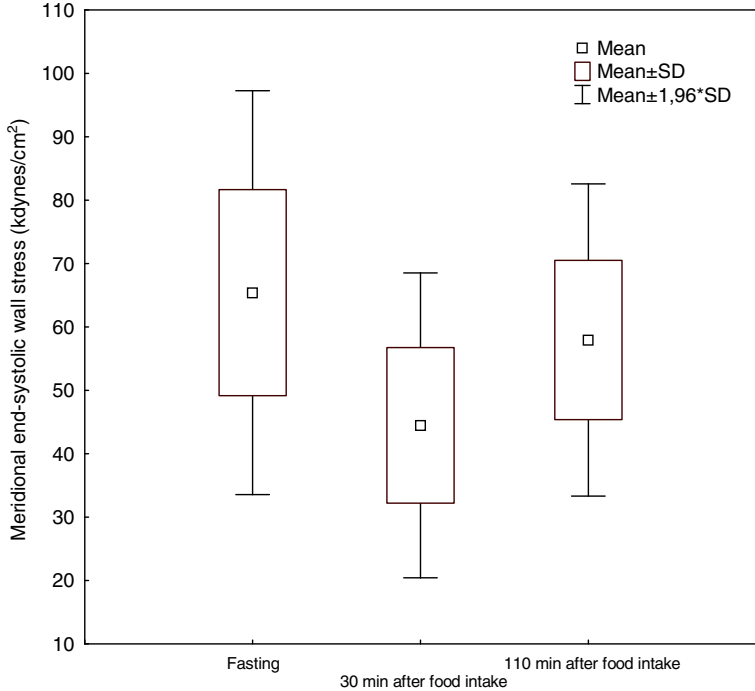

Supplement: MOESM1 [file 9555928]
